# Supplementary material for: Surface-tension-confined assembly of a metal–organic framework in femtoliter droplet arrays
Source: Royal Society of Chemistry journal article supplement (doi:10.1039/c7ra13250f), 2018-01-01
Supplement: c7ra13250f1.pdf [file c7ra13250f1.pdf]

# Surface-tension-confined assembly of metal–organic framework in femtoliter droplet arrays

Zhongsheng WU<sup>a</sup>, Yinyin LIN<sup>a</sup>, Juanjuan XING<sup>b</sup>, Mengying Zhang<sup>c</sup> and Jinbo WU<sup>\* a</sup>

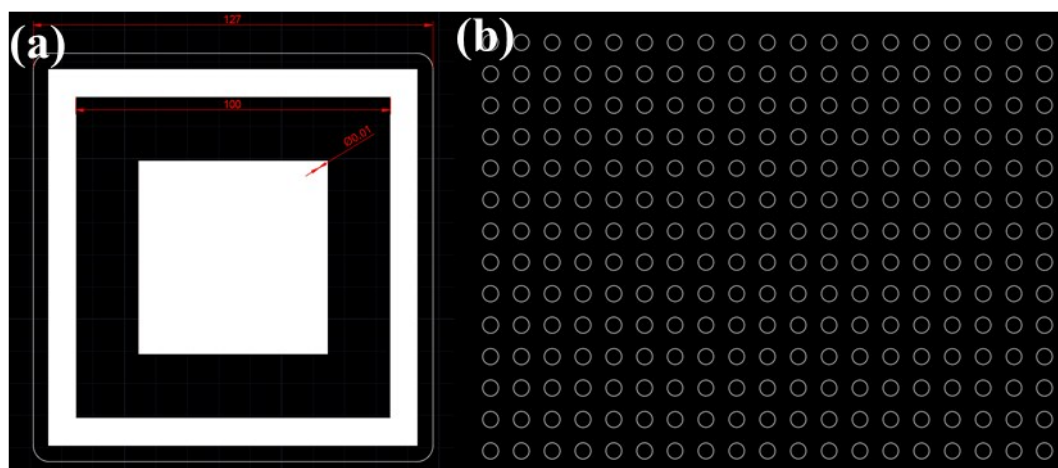

**Figure S1.** The transparency mask including holes in array whose droplet diameter is 10  $\mu\text{m}$ . (a) Schematic view of the transparency mask; (b) Concept diagram of holes in array.

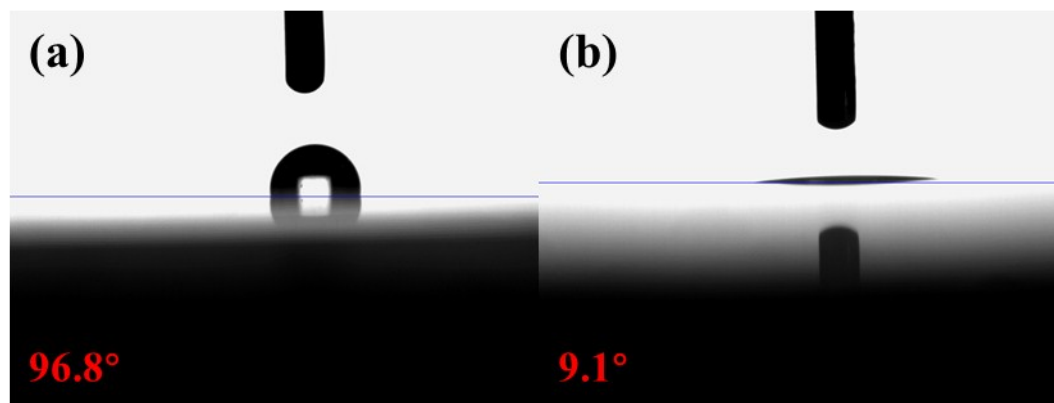

**Figure S2.** Static contact angles of SoF solution on the wettable and nonwetable surface. (a) Static contact angle of SoF solution on the nonwetable surface of glass substrate; (b) Static contact angle of SoF solution on the nonwetable surface of glass substrate.
